# Supplementary material for: A red-emitting fluorescent probe for hydrogen sulfide in living cells with a large Stokes shift
Source: Royal Society of Chemistry journal article supplement (doi:10.1039/c7ob02641b), 2018-01-01
Supplement: c7ob02641b1.pdf [file c7ob02641b1.pdf]

## Supplementary Information

### A red-emitting fluorescence probe for hydrogen sulfide in living cells with a large Stokes shift

Lei Yang,<sup>a</sup> Yuanan Su,<sup>a</sup> Zhankui Sha,<sup>b</sup> Yani Geng,<sup>a</sup> Fengpei Qi<sup>a,c</sup> and Xiangzhi Song<sup>a\*</sup>

<sup>a</sup> College of Chemistry & Chemical Engineering, Central South University, Changsha, Hunan Province, P. R. China, 410083.

<sup>b</sup> Faculty of Materials Science and Chemistry, China University of Geosciences, Wuhan, Hubei, Province, P.R. China 430074,

<sup>c</sup> Department of Chemistry and Environmental Engineering, Hunan City University, Yiyang, Hunan Province, P. R. China, 413000.

\* Corresponding author. Fax: +86-731-88836954; Tel: +86-731-88836954; E-mail: xzsong@csu.edu.cn

|                       |    |
|-----------------------|----|
| <b>Table S1</b> ..... | 2  |
| <b>Fig. S1</b> .....  | 3  |
| <b>Fig. S2</b> .....  | 4  |
| <b>Fig. S3</b> .....  | 4  |
| <b>Fig. S4</b> .....  | 5  |
| <b>Fig. S5</b> .....  | 5  |
| <b>Fig. S6</b> .....  | 6  |
| <b>Fig. S7</b> .....  | 6  |
| <b>Fig. S8</b> .....  | 7  |
| <b>Fig. S9</b> .....  | 7  |
| <b>Fig. S10</b> ..... | 8  |
| <b>Fig. S11</b> ..... | 8  |
| <b>Fig. S12</b> ..... | 9  |
| <b>Fig. S13</b> ..... | 10 |

**Table S1** Fluorescent probes for Hydrogen sulfide based on the reaction of azido reduction.

| Probe                                                                               | $\lambda_{ex}/\lambda_{em}$ | Stokes shift | Literature                                 |
|-------------------------------------------------------------------------------------|-----------------------------|--------------|--------------------------------------------|
| 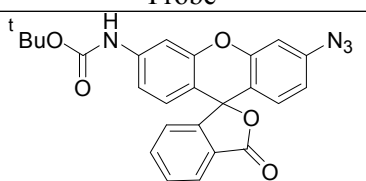   | 490 nm/525 nm               | 35 nm        | J. Am. Chem. Soc. 2011, 133, 10078–10080   |
|    | 440 nm/500 nm               | 60 nm        | Anal. Chem. 2016, 88, 7873-7877            |
|    | 375 nm/450 nm               | 75 nm        | Chem. Comm, 2014, 50, 4214-4217            |
|    | 565 nm/590 nm               | 25 nm        | Anal. Bioanal. Chem., 404, 2012, 1919–1923 |
|    | 390 nm/483 nm               | 93 nm        | J. Fluoresc, 23, 2013, 181–186             |
|   | 480 nm/525 nm               | 45 nm        | PNAS, 2013, 18, 7131–7135                  |
|  | 350 nm/423 nm               | 73 nm        | Org. Biomol. Chem., 2012, 10, 9683         |
|  | 381 nm/462 nm               | 81 nm        | RSC Adv., 2016, 6, 62406–62410             |
|  | 575 nm/600 nm               | 25 nm        | Chem. Commun., 2017, 53, 2275--2278        |
|  | 444 nm/520 nm               | 76 nm        | Org. Biomol. Chem., 2013, 11, 8166–8170    |
|  | 340 nm/445 nm               | 115 nm       | Analyst, 2013, 138, 946–951                |

|                                                                                   |               |        |                                           |
|-----------------------------------------------------------------------------------|---------------|--------|-------------------------------------------|
| 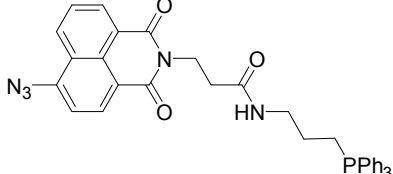 | 440 nm/540 nm | 100 nm | Sensors and Actuators B, 2017, 248, 50–56 |
|  | 346 nm/516 nm | 170 nm | Tetrahedron, 2016, 72, 3531-3534          |
|  | 485 nm/610 nm | 125 nm | This Work                                 |

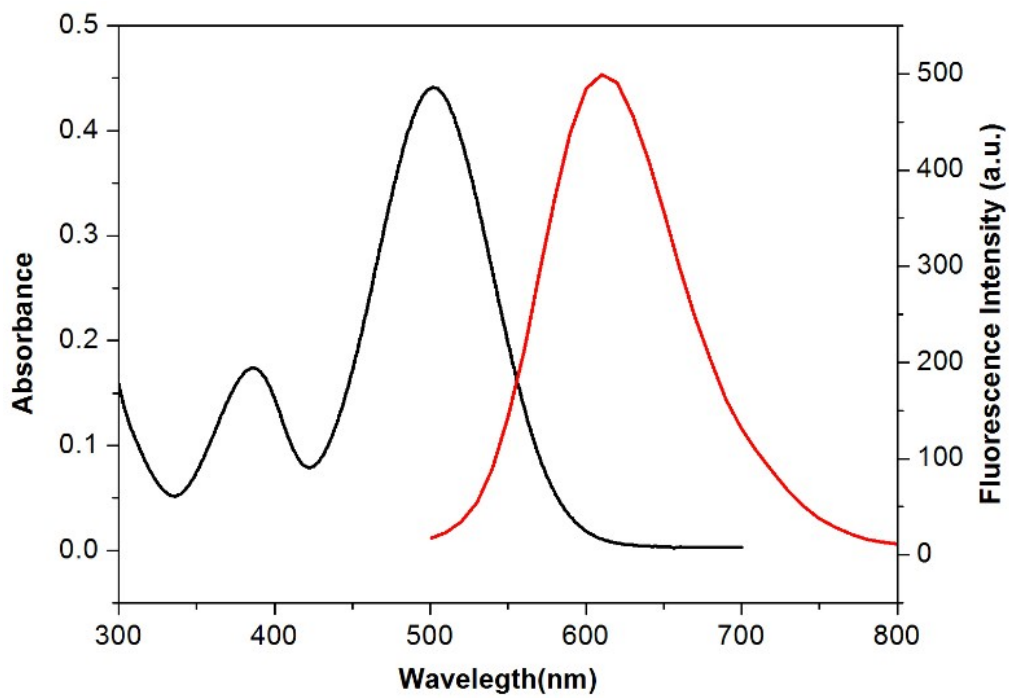

**Fig. S1** Absorption (black) and emission (red) spectra of dye **5** in HEPES buffer (20.0 mM, 1.0 mM CTAB, pH=7.4).

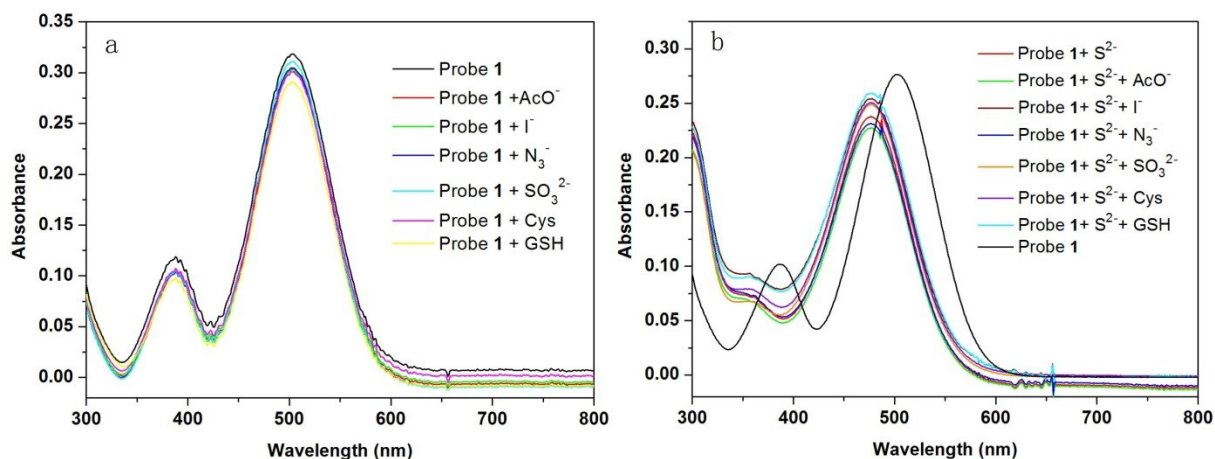

**Fig. S2** (a) Absorption spectra of Probe **1** ( $10.0 \mu\text{M}$ ) upon the treatment with electron donors in HEPES buffer ( $20.0 \text{ mM}$ ,  $1.0 \text{ mM}$  CTAB,  $\text{pH} = 7.4$ ). (b) Absorption spectra of Probe **1** ( $10.0 \mu\text{M}$ ) in response to  $\text{Na}_2\text{S}$  ( $5.0 \text{ equiv.}$ ) with the co-existence of electron donors in HEPES buffer ( $20.0 \text{ mM}$ ,  $1.0 \text{ mM}$  CTAB,  $\text{pH} = 7.4$ ).

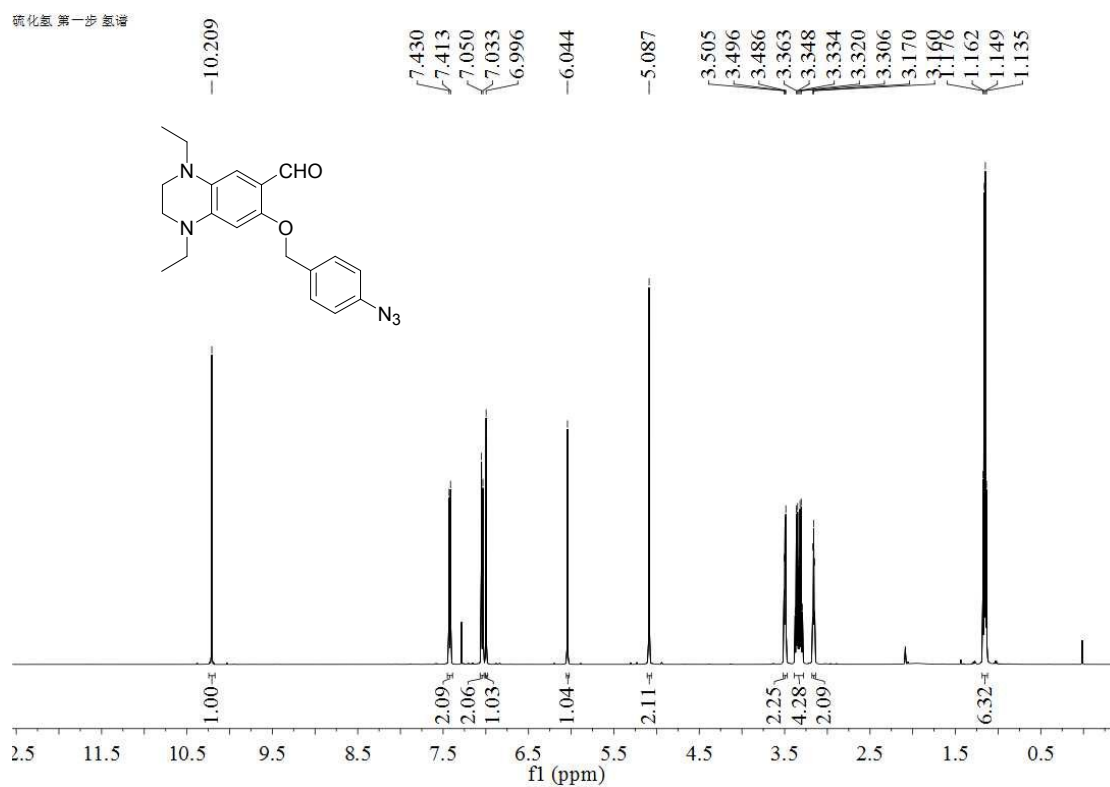

**Fig. S3**  $^1\text{H}$  NMR spectrum of compound **4** in  $\text{CDCl}_3$ .

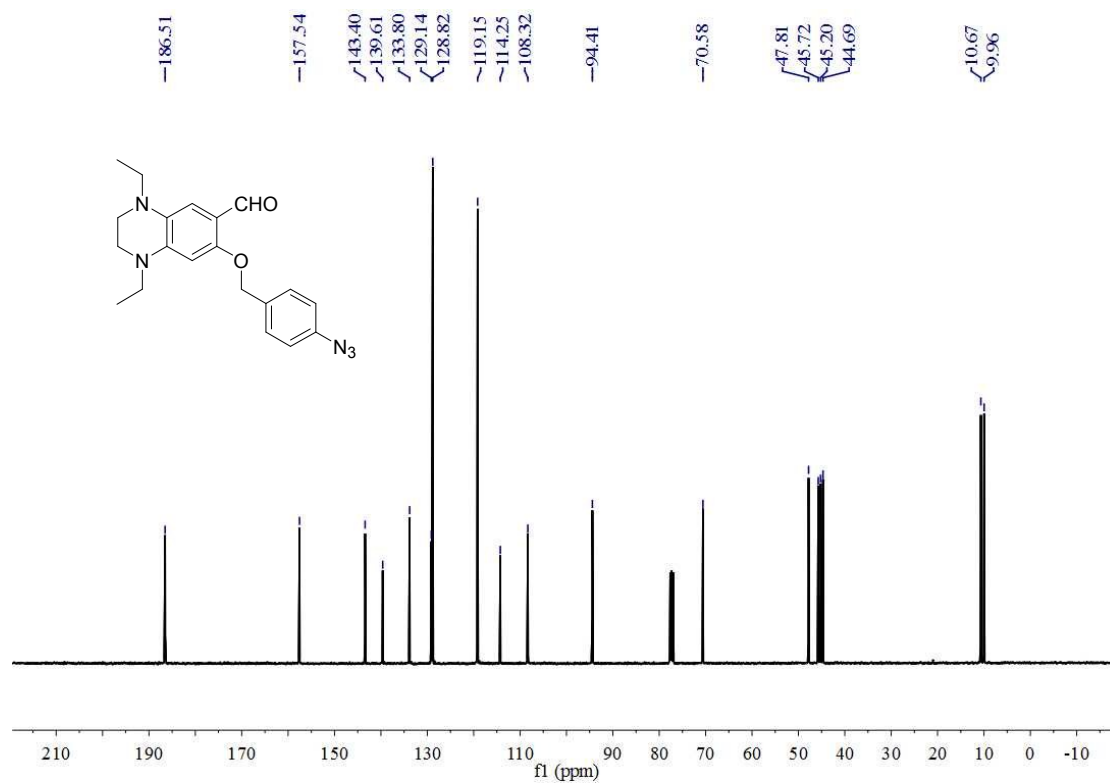

Fig. S4  $^{13}\text{C}$  NMR spectrum of compound 4 in  $\text{CDCl}_3$ .

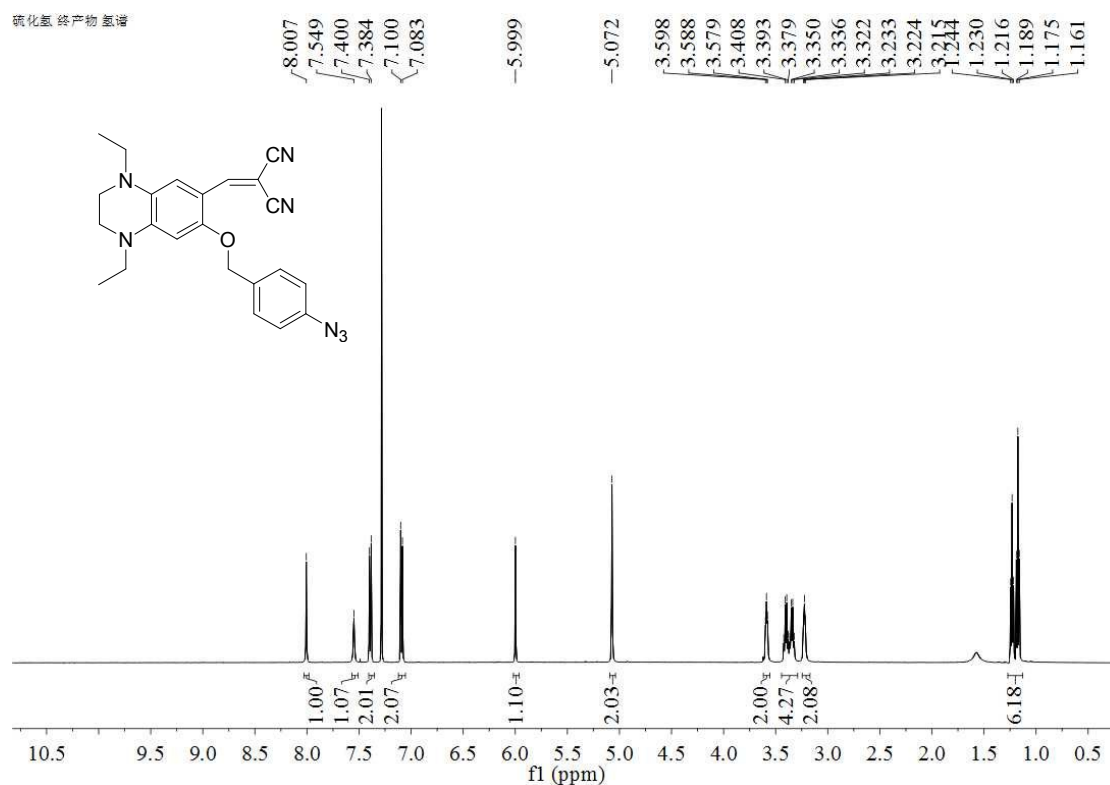

Fig. S5  $^1\text{H}$  NMR spectrum of Probe 1 in  $\text{CDCl}_3$ .

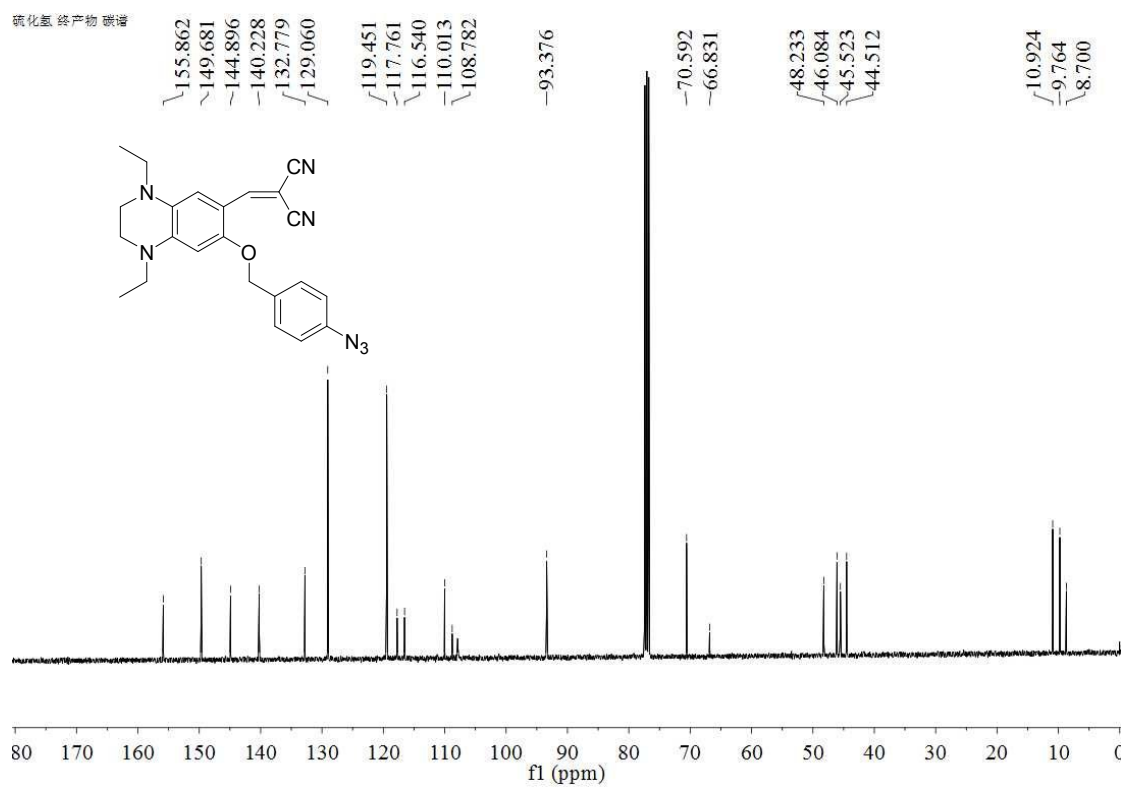

Fig. S6  $^{13}\text{C}$  NMR spectrum of Probe 1 in  $\text{CDCl}_3$ .

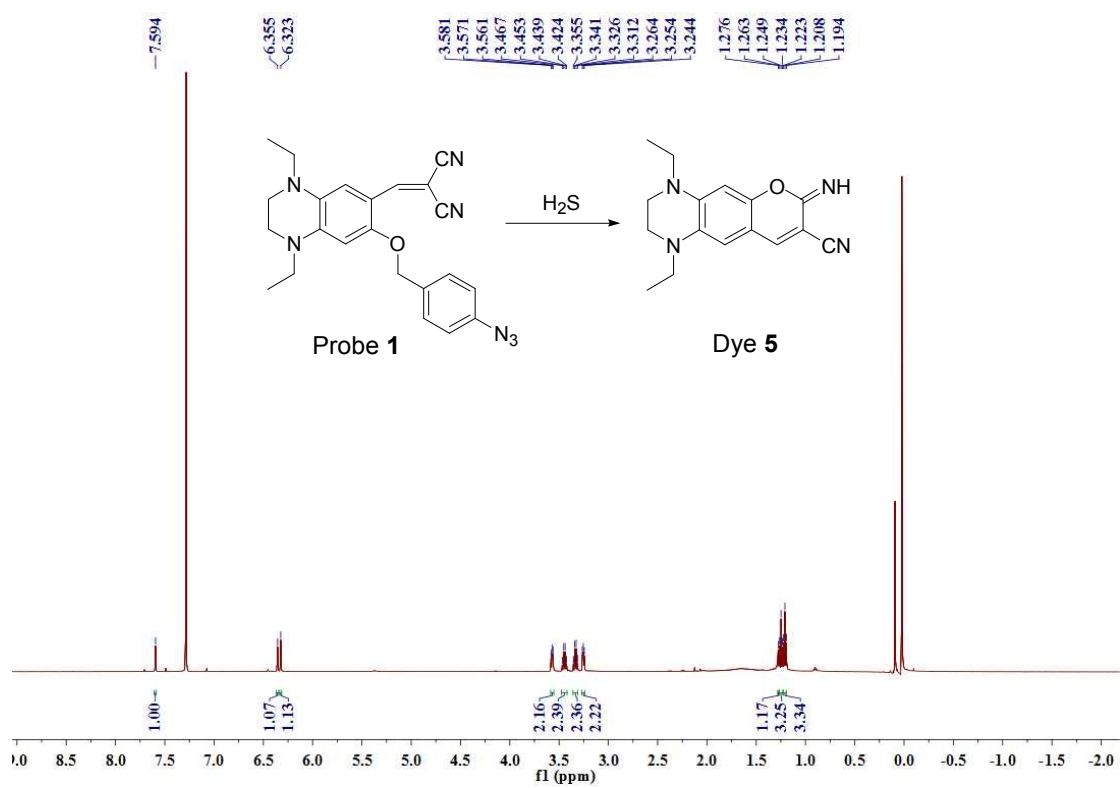

Fig. S7  $^1\text{H}$  NMR spectrum of the reaction product of Probe 1 with  $\text{Na}_2\text{S}$  in  $\text{CDCl}_3$ .

kwl-4

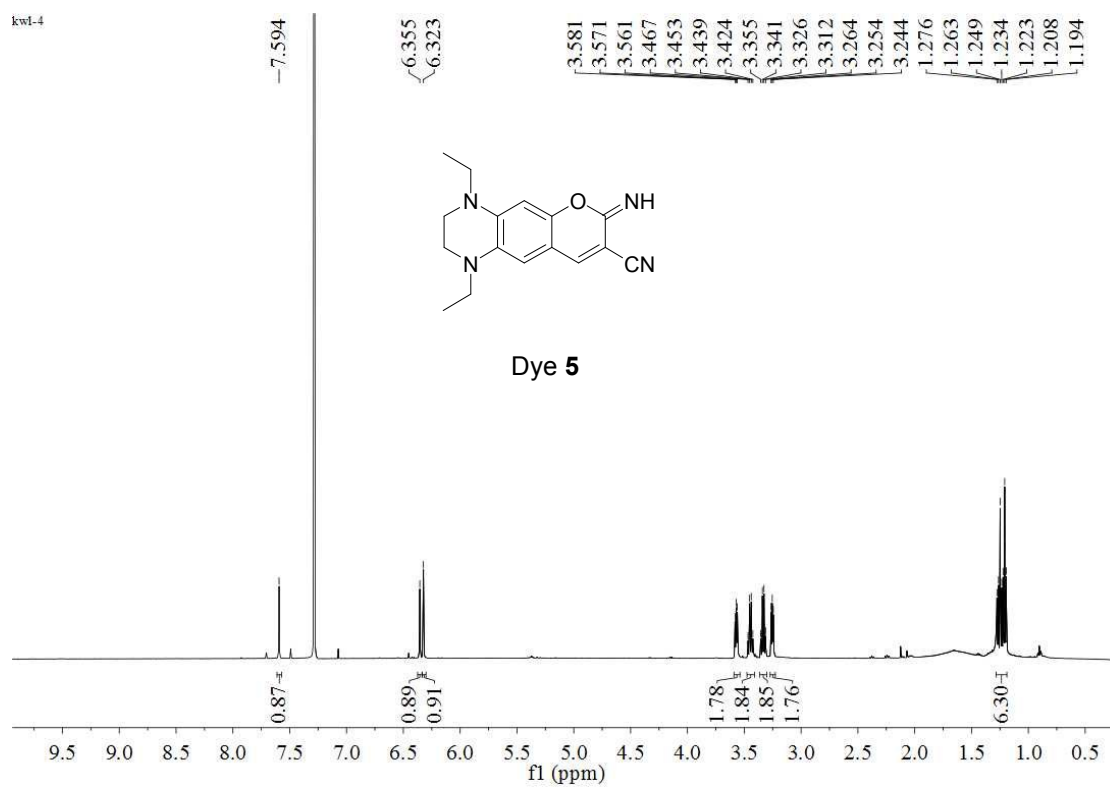

**Fig. S8**  $^1\text{H NMR}$  spectrum of dye 5 in  $\text{CDCl}_3$ .

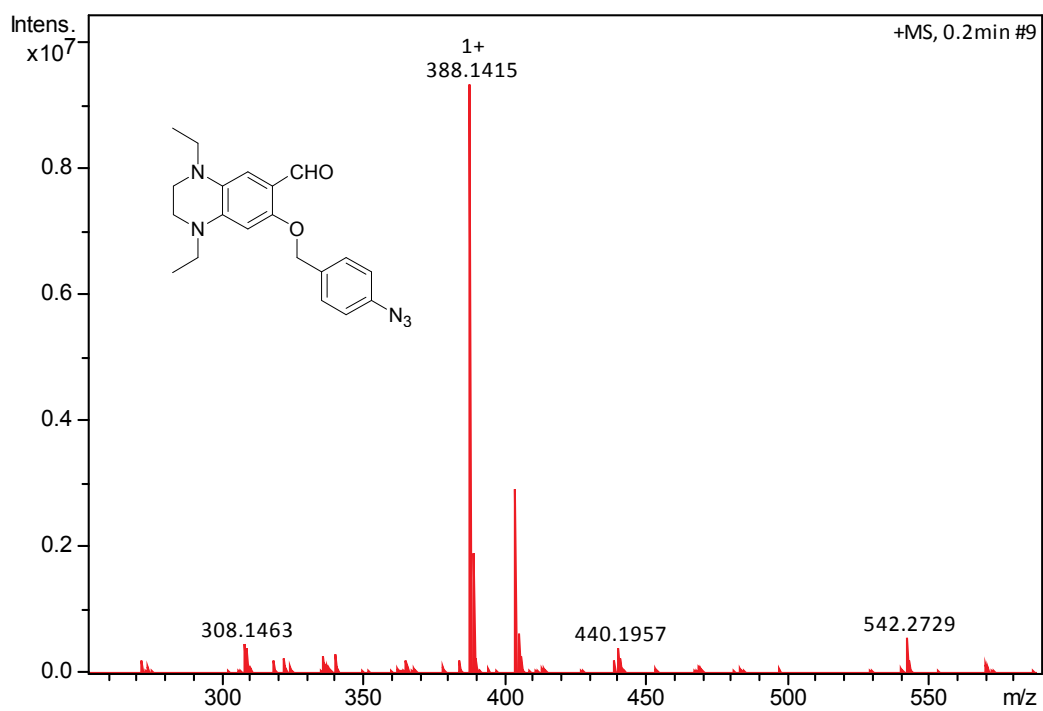

**Fig. S9** HRMS spectrum of compound 4.

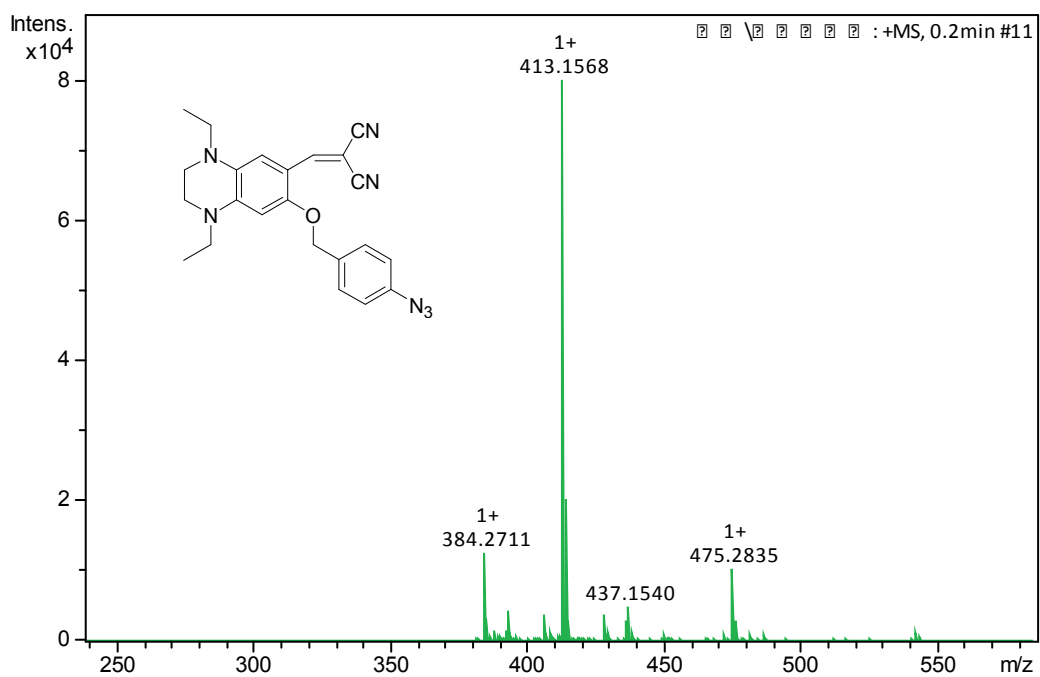

**Fig. S10** HRMS spectrum of Probe 1.

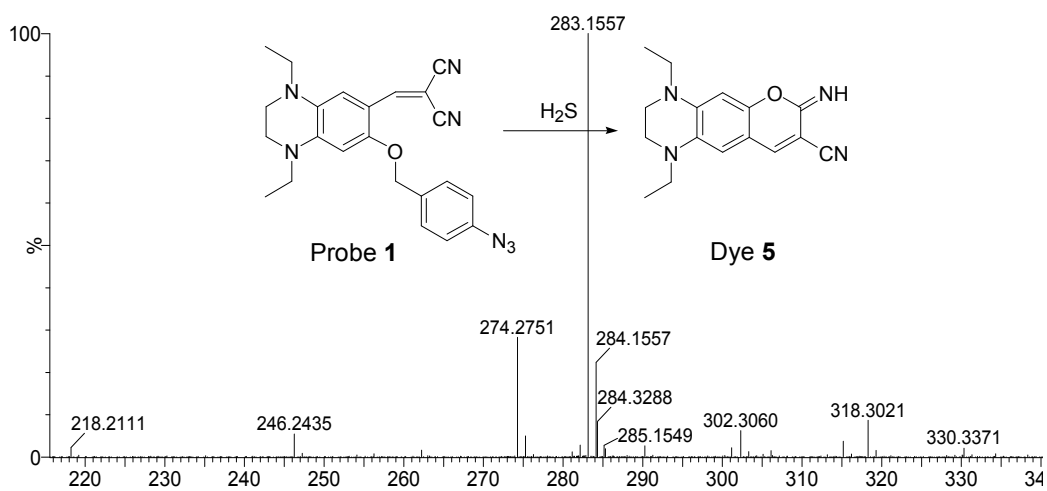

**Fig. S11** HRMS spectrum of the reaction product from Probe 1 with  $\text{Na}_2\text{S}$ .



## Comparison of Probe 1 and AcHS in response H<sub>2</sub>S

**AcHS** in the literature (J. Org. Chem. 2014, 79, 9481–9489) was prepared to compare with our probe in the detection of H<sub>2</sub>S in solution. In EtOH/PBS (v/v 1:4, pH=7.0), at least 120 min is needed to reach the maximized fluorescence enhancement when **AcHS** (10  $\mu$ M) was treated with 100 equiv. of Na<sub>2</sub>S. In our work, the fluorescence intensity reached a plateau within 30 min when our probe (10  $\mu$ M) was treated with 5.0 equiv. of Na<sub>2</sub>S in HEPES buffer (20.0 mM, pH = 7.4, 1.0 mM CTAB). CTAB (cetyl trimethyl ammonium Bromide) is a cationic surfactant, and forms micelles in aqueous solutions which act as "microreactors" to dramatically enhance the reaction rate between the organic reactant.<sup>[1]</sup> The presence of CTAB in aqueous solution can significantly accelerate the reaction rate of many reactions at a low concentration.<sup>[2]</sup> Therefore, we investigated the fluorescence response of **AcHS** (10  $\mu$ M) toward Na<sub>2</sub>S in HEPES buffer (20.0 mM, pH = 7.4 with 1.0 mM CTAB). First, we incubated Probe **AcHS** (10  $\mu$ M) in HEPES buffer (20.0 mM, pH = 7.4, 1.0 mM CTAB) with different concentrations of Na<sub>2</sub>S (0-11 equiv.) for 1 hour. As shown in Fig. S12, the fluorescence signal levelled off when the concentration of Na<sub>2</sub>S exceeded 100  $\mu$ M (10 equiv.). As a result, the time-dependent fluorescence experiment was conducted using 100  $\mu$ M Na<sub>2</sub>S to react with 10  $\mu$ M **AcHS** in HEPES buffer (20.0 mM, pH = 7.4, 1.0 mM CTAB). It was seen in Fig. S13 that a maximized fluorescence signal was obtained within 10 min. This result, coupled with our work and the work in the literature (J. Org. Chem. 2014, 79, 9481–9489), indicated that CTAB played an important role in accelerating the sensing reaction.

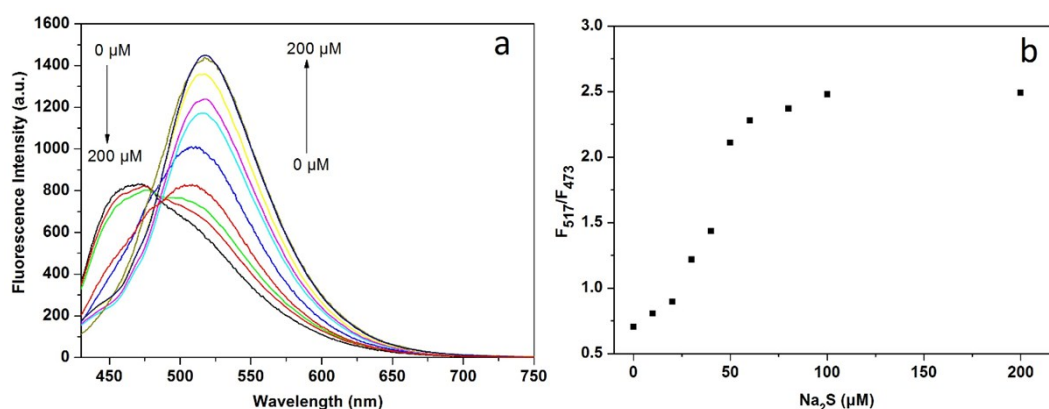

**Fig. S12** (a) Fluorescence spectra of **AcHS** (10  $\mu$ M) with Na<sub>2</sub>S (0-200  $\mu$ M) for 1 hour in HEPES buffer (20.0 mM, pH = 7.4, 1.0 mM CTAB). (b) Ratio of emission intensity of **AcHS** (10  $\mu$ M) after incubation with different concentrations of Na<sub>2</sub>S for 1 hour in HEPES buffer (20.0 mM, pH = 7.4, 1.0 mM CTAB). Excitation wavelength: 410 nm. EX/EM slits: 5 nm.

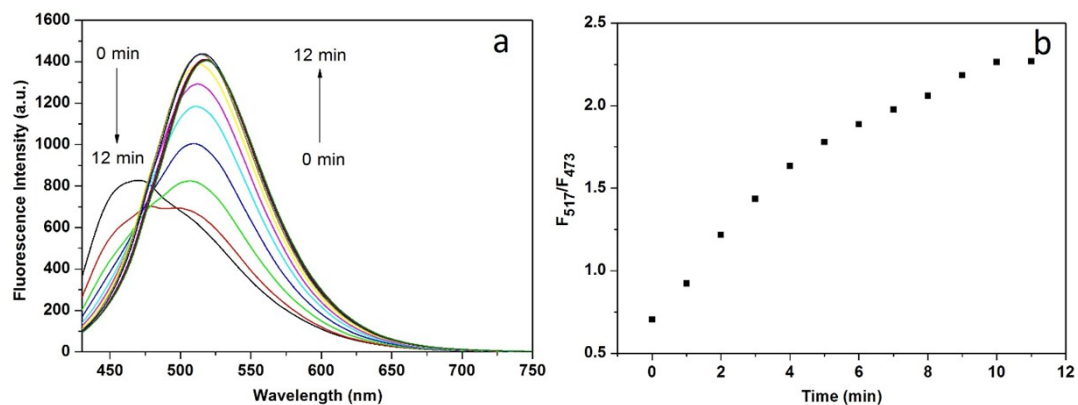

**Fig. S13** (a) Time-dependent fluorescence spectra of **AcHS** (10  $\mu\text{M}$ ) with the solution of  $\text{Na}_2\text{S}$  (100  $\mu\text{M}$ ) in HEPES buffer (20.0 mM, pH = 7.4, 1.0 mM CTAB). (b) Ratio of emission intensity of **AcHS** (10  $\mu\text{M}$ ) with the solution of  $\text{Na}_2\text{S}$  (100  $\mu\text{M}$ ) in HEPES buffer (20.0 mM, pH = 7.4, 1.0 mM CTAB) as a function of time. Excitation wavelength: 410 nm. EX/EM slits: 5 nm.

1. C. A. Bunton, F. Nome, F. H. Quina and L. S. Romsted, Ion binding and reactivity at charged aqueous interfaces, *Accounts of Chemical Research*, 1991, 24, 357-364.

2. B. Samiey, C.-H. Cheng, and J. Wu, Effects of Surfactants on the Rate of Chemical Reactions, *Journal of Chemistry*, 2014, Article ID 908476, 14 pages.
